# Supplementary material
Source: publisher figshare collection journal article supplement (https://gsajournals.figshare.com/ndownloader/files/13477046)
Supplement: Supplementary file 1 [file 13477046]

## Sheet: Table_S2.GBS_read_summary
Table S1. Summary of GBS data generated for the winter wheat diversity panel.
Accession	Number of reads after quality filtering	Reads aligned	Reads uniquely aligned	Proportion of aligned reads	Proportion of uniquely aligned reads
2145	1490578	1344691	515213	0.9	0.35
2180	3090343	2632205	1626933	0.85	0.53
2174-05	4680790	4093664	2430221	0.87	0.52
Above	2220669	2052439	1153250	0.92	0.52
Agate	1803277	1500100	897250	0.83	0.5
Akron	1416135	1237040	529716	0.87	0.37
Alice	2338118	1973570	1268072	0.84	0.54
Alliance	2737124	2407428	1478995	0.88	0.54
Altron	2815644	2505551	1543057	0.89	0.55
Antelope	2194030	1984129	1213480	0.9	0.55
Anton	2755897	2256062	1495142	0.82	0.54
Arapahoe	3237177	2688016	1675983	0.83	0.52
Arlin	2132657	1889534	1166247	0.89	0.55
Arrowsmith	3037272	2655518	1620728	0.87	0.53
Avalanche	1661209	1490301	889718	0.9	0.54
Bennett	1556319	1303225	793704	0.84	0.51
BigSky	2146755	1775298	1145181	0.83	0.53
BillBrown	2808252	2413617	1545766	0.86	0.55
Bison	1470497	1242106	505379	0.84	0.34
BondCL	2890453	2462781	1531136	0.85	0.53
Bronze	2576728	2282655	1346655	0.89	0.52
Buckskin	1962709	1783880	1060250	0.91	0.54
Burchett	1062126	912127	321593	0.86	0.3
Camelot	1338095	1185861	547402	0.89	0.41
Caprock	1970002	1638740	1060754	0.83	0.54
Carson	2669323	2263015	1477912	0.85	0.55
Centerfield	2843811	2495434	1567878	0.88	0.55
Centura	2737080	2526255	1498917	0.92	0.55
Centurk78	2807225	2503700	1515957	0.89	0.54
Century	2319850	1973550	1231907	0.85	0.53
Cheney	3605717	3159897	1927969	0.88	0.53
Cheyenne	2238691	1867330	1211728	0.83	0.54
Chisholm	2381961	2000411	1307455	0.84	0.55
CO03064	2249286	1995712	1189899	0.89	0.53
CO03W043	2925742	2504369	1567168	0.86	0.54
CO03W054	3026944	2512695	1632625	0.83	0.54
CO03W239	2984860	2687125	1596494	0.9	0.53
CO04025	3027051	2551028	1661318	0.84	0.55
CO040610	1939862	1704754	1062965	0.88	0.55
CO04393	1888511	1673442	997750	0.89	0.53
CO04499	2133446	1924183	1160178	0.9	0.54
CO04W320	8053752	7002995	4203360	0.87	0.52
CO940610	1099179	966964	425094	0.88	0.39
Colt	2970715	2438455	1599855	0.82	0.54
Comanche	2162588	1839082	778938	0.85	0.36
Cossack	1367583	1160522	392327	0.85	0.29
Cougar	3015525	2609195	1569221	0.87	0.52
Cree	2560750	2311146	1324873	0.9	0.52
Crest	1564200	1372882	830142	0.88	0.53
Crimson	2660101	2290298	1438231	0.86	0.54
Culver	1918786	1710243	1054414	0.89	0.55
Custer	2169314	1870294	1163589	0.86	0.54
Cutter	1589415	1309885	493196	0.82	0.31
Danby	2496537	2064170	1185544	0.83	0.47
Darrell	1887443	1661578	995157	0.88	0.53
Dawn	3135118	2621921	1719869	0.84	0.55
Deliver	2131739	1772016	1088160	0.83	0.51
Dodge	3009028	2733153	1525816	0.91	0.51
Duke	2637039	2282204	1421372	0.87	0.54
Dumas	1979447	1642250	642592	0.83	0.32
Duster	3073110	2748547	1663504	0.89	0.54
Eagle	1647204	1485192	574670	0.9	0.35
Endurance	3078260	2674819	1510460	0.87	0.49
Enhancer	1538779	1315887	523229	0.86	0.34
Erhardt	2683828	2360497	1436140	0.88	0.54
Expedition	2364037	2081219	1290807	0.88	0.55
Froid	2718317	2429925	1460113	0.89	0.54
Fuller	2257629	2031876	1156852	0.9	0.51
G1878	2085001	1732630	1137935	0.83	0.55
Gage	2245600	1999323	1196216	0.89	0.53
Genou	3087447	2563722	1579977	0.83	0.51
Gent	2287607	2020407	1232488	0.88	0.54
Goodstreak	3163207	2846931	1765978	0.9	0.56
Guymon	2915759	2617630	1594336	0.9	0.55
Hail	4625074	4143080	2438769	0.9	0.53
Hallam	2662552	2382191	1448018	0.89	0.54
Halt	2616713	2305400	1427790	0.88	0.55
Harding	3130863	2669331	1669626	0.85	0.53
Harry	2696796	2379053	1439466	0.88	0.53
Hatcher	2918990	2633046	1562868	0.9	0.54
Heyne	2021073	1856251	668696	0.92	0.33
HG-9	2749429	2449682	1437527	0.89	0.52
Homestead	2639802	2341050	1388778	0.89	0.53
Hondo	1813451	1633511	554444	0.9	0.31
Hume	3108514	2636191	1659460	0.85	0.53
HV906-865	2925581	2616351	1558239	0.89	0.53
HV9W03-1379R	7875462	6665670	3998203	0.85	0.51
HV9W03-1551WP	2239240	1916628	1185735	0.86	0.53
HV9W03-1596R	1892353	1578577	969953	0.83	0.51
HV9W05-1280R	2246233	1996129	1201279	0.89	0.53
HV9W06-504	2800529	2329202	1466142	0.83	0.52
IC258	6741	5884	1005	0.87	0.15
IC260	471189	425744	112674	0.9	0.24
IC263	521707	474856	120444	0.91	0.23
Infinity	1899057	1639663	1017038	0.86	0.54
Intrada	2713854	2407611	1476709	0.89	0.54
Itana	2854108	2371814	1440234	0.83	0.5
Jagalene	1663137	1413895	562582	0.85	0.34
Jagger	2640776	2379684	1443057	0.9	0.55
Jerry	2530571	2346283	1389422	0.93	0.55
Judith	3793684	3421833	2069234	0.9	0.55
Jules	2143290	1862738	1129997	0.87	0.53
K05204	2209775	1795781	1212507	0.81	0.55
Karl92	1558265	1409710	920717	0.9	0.59
Keota	1882635	1671803	640665	0.89	0.34
Kharkof	2055703	1744558	1123567	0.85	0.55
Kiowa	1710885	1509729	552960	0.88	0.32
Kirwin	2250740	1857115	699413	0.83	0.31
KS00F5-20-3	1376929	1164175	482128	0.85	0.35
KS89180B	395537	323252	216227	0.82	0.55
Lakin	2350487	2108958	1161319	0.9	0.49
Lamar	2279002	2087437	1268431	0.92	0.56
Lancer	3154023	2686244	1744879	0.85	0.55
Larned	2926437	2410628	1534717	0.82	0.52
Lindon	1577468	1363656	571424	0.86	0.36
Lockett	2449858	2217073	1154585	0.9	0.47
Longhorn	1903463	1553621	578851	0.82	0.3
Mace	1056558	898959	613321	0.85	0.58
McGuire	890771	793759	511558	0.89	0.57
McNair701	633882	549519	319007	0.87	0.5
Millenium	1622638	1379638	872793	0.85	0.54
Mit	2886001	2507128	1483882	0.87	0.51
MT0495	2159956	1856600	1106822	0.86	0.51
MT0552	2486649	2277499	1153484	0.92	0.46
MT06103	3374346	2942068	1789396	0.87	0.53
MT85200	3080118	2546706	1646188	0.83	0.53
MT88001	2870129	2367968	1550035	0.83	0.54
MT9409	2935234	2593078	1574373	0.88	0.54
MT9513	3367858	3085810	1687962	0.92	0.5
MT9514	2381700	2076616	1272045	0.87	0.53
MT9904	4896159	4343493	2616090	0.89	0.53
MT9982	3020975	2660639	1629668	0.88	0.54
MTS0531	4692565	3990468	2619866	0.85	0.56
MTS0713	2733495	2452035	1393289	0.9	0.51
NE01604	2419408	2207253	1365968	0.91	0.56
NE01643	2258872	2053513	1250451	0.91	0.55
NE99495	2505771	2243124	1308055	0.9	0.52
Nekota	2057845	1813113	1116793	0.88	0.54
Nell	1701383	1442005	842507	0.85	0.5
Neosho	1709619	1447237	544249	0.85	0.32
Newton	2802354	2343210	1402938	0.84	0.5
NH03614	1795145	1456551	905224	0.81	0.5
Niobrara	1672577	1455911	877008	0.87	0.52
Norkan	1760025	1430395	803200	0.81	0.46
Norris	3602324	2935905	1875982	0.82	0.52
NuFrontier	1263288	1069899	389416	0.85	0.31
NuHorizon	1938640	1603243	597788	0.83	0.31
Nuplains	7149291	6392745	3344360	0.89	0.47
NuSky	2947509	2644328	1551932	0.9	0.53
NuWest	1464548	1202241	851058	0.82	0.58
Ogallala	2109747	1936381	717257	0.92	0.34
OK_Rising	1792269	1575009	683748	0.88	0.38
OK02405	2768813	2568121	1479055	0.93	0.53
OK02522W	2645910	2279346	1422970	0.86	0.54
OK03305	1901116	1545515	1029549	0.81	0.54
OK03522	2123740	1868111	1153369	0.88	0.54
OK04111	1953863	1721794	1047742	0.88	0.54
OK04415	2739381	2275937	1330222	0.83	0.49
OK04505	1602027	1432736	861728	0.89	0.54
OK04507	2234761	1817617	1069103	0.81	0.48
OK04525	1900804	1670584	999925	0.88	0.53
OK05108	2099613	1755673	1127738	0.84	0.54
OK05122	2216752	2013706	1194330	0.91	0.54
OK05134	2227530	1971453	1189578	0.89	0.53
OK05212	3180293	2892480	1753859	0.91	0.55
OK05303	1956926	1714821	1011286	0.88	0.52
OK05312	3016757	2700250	1658831	0.9	0.55
OK05511	2881823	2602998	1437184	0.9	0.5
OK05526	2699490	2441904	1340672	0.9	0.5
OK05711W	1861891	1566731	1028655	0.84	0.55
OK05723W	3246291	2864953	1588839	0.88	0.49
OK05830	2660003	2199982	1319356	0.83	0.5
Ok06114	2427184	1949946	1217365	0.8	0.5
OK06210	2776303	2308144	1514075	0.83	0.55
OK06318	1772516	1542980	979110	0.87	0.55
OK06319	2288908	1968992	1234569	0.86	0.54
OK06336	2091016	1873671	1152058	0.9	0.55
OK07214	818638	670952	254386	0.82	0.31
OK07231	1431790	1237904	512897	0.86	0.36
OK07S117	63161	54742	20254	0.87	0.32
OK08328	1260808	1088079	395775	0.86	0.31
OK09634	2185946	1990272	685178	0.91	0.31
OK101	1864067	1698356	1502998	0.91	0.81
OK10119	1540187	1385038	483728	0.9	0.31
OK102	551305	475549	328292	0.86	0.6
OK1067071	1577469	1393202	500191	0.88	0.32
OK1067274	1838417	1509170	578924	0.82	0.31
OK1068002	2594600	2215142	812613	0.85	0.31
OK1068009	1724566	1478034	543109	0.86	0.31
OK1068026	2095157	1929818	652219	0.92	0.31
OK1068112	1911793	1737952	629100	0.91	0.33
OK1070267	1612892	1418415	491658	0.88	0.3
OK1070275	1841001	1502175	550423	0.82	0.3
OKBullet	2135037	1899847	1128352	0.89	0.53
Onaga	1155937	1005357	370527	0.87	0.32
Overland	1461146	1288885	564718	0.88	0.39
Overley	2568041	2246411	1279558	0.87	0.5
Parker	1954350	1720018	599463	0.88	0.31
Paul	1082830	928088	637707	0.86	0.59
Pete	1429745	1228566	539897	0.86	0.38
Platte	2965289	2435489	1570598	0.82	0.53
PostRock	2046762	1704082	994923	0.83	0.49
PrairieRed	1704087	1471738	889333	0.86	0.52
Pronghorn	5333471	4802078	2870425	0.9	0.54
Prowers	1893173	1691617	1016781	0.89	0.54
Rampart	3040189	2715145	1395148	0.89	0.46
Rawhide	4108868	3689317	1890818	0.9	0.46
Redland	1195067	1050492	620807	0.88	0.52
Redwin	1237949	1088882	732102	0.88	0.59
Rego	2550465	2186836	1344747	0.86	0.53
Ripper	2383000	1929405	1169722	0.81	0.49
Rita	3110663	2671554	1710686	0.86	0.55
RonL	1532387	1288807	528773	0.84	0.35
Rose	2577430	2107276	2408286	0.82	0.93
Rosebud	1938853	1624177	1007635	0.84	0.52
Sage	2003063	1760809	673449	0.88	0.34
Sandy	2790536	2270562	1479681	0.81	0.53
Scout66	1818658	1505780	936726	0.83	0.52
SD00111-9	2675555	2264224	1419811	0.85	0.53
SD01058	1805482	1546622	919696	0.86	0.51
SD01237	1149631	996477	677267	0.87	0.59
SD05118	3268790	2942255	1757611	0.9	0.54
SD05210	2495839	2129247	1310343	0.85	0.53
SD05W012	3122098	2551863	1650215	0.82	0.53
SD05W018	3333581	3011525	1822400	0.9	0.55
Settler_CL	1664297	1378968	608521	0.83	0.37
Shawnee	1863000	1667125	604681	0.89	0.32
Shocker	2748651	2303000	1464117	0.84	0.53
Siouxland	1801934	1535475	924108	0.85	0.51
SmokyHill	3793054	3335325	2030626	0.88	0.54
Spartan	2344584	1989989	1205499	0.85	0.51
Stanton	2739322	2308988	1236959	0.84	0.45
Sturdy	1490560	1294684	4127532	0.87	2.77
Sturdy2K	6474374	5280448	3325230	0.82	0.51
TAM105	4272575	3890690	2395494	0.91	0.56
TAM107	2801627	2380385	1463686	0.85	0.52
Tam107-R7	2461710	2186818	1354383	0.89	0.55
TAM109	2191533	1908889	1163924	0.87	0.53
TAM110	3015583	2637194	1592714	0.87	0.53
TAM111	2529953	2189330	1360060	0.87	0.54
TAM112	1747620	1589131	905968	0.91	0.52
TAM200	2526949	2165776	1345772	0.86	0.53
TAM202	1884210	1734188	984736	0.92	0.52
TAM203	2225652	2029005	1206122	0.91	0.54
TAM302	2613227	2374027	1396733	0.91	0.53
TAM303	1389529	1154474	694340	0.83	0.5
TAM304	2618732	2334219	1437250	0.89	0.55
TAM400	2006668	1760325	1080552	0.88	0.54
TAM401	1936861	1717975	1002807	0.89	0.52
TAMW-101	1983000	1743141	1051727	0.88	0.53
Tandem	3176220	2830849	1726910	0.89	0.54
Tarkio	2332282	1908424	1228581	0.82	0.53
Tascosa	1718408	1484715	527490	0.86	0.31
Teton	3789889	3341235	1976446	0.88	0.52
Thunderbolt	1697177	1533676	554529	0.9	0.33
ThunderCL	2002841	1736989	740617	0.87	0.37
Tiber	3151657	2646511	1626572	0.84	0.52
Trego	1942804	1593719	962339	0.82	0.5
Trison	1808078	1638465	603960	0.91	0.33
Triumph64	1980870	1804803	1088436	0.91	0.55
Turkey	2361841	2139253	1297992	0.91	0.55
TX00V1131	3286785	2722442	1742881	0.83	0.53
TX01A5936	2004235	1793296	1048944	0.89	0.52
TX01M5009-28	3496933	3156969	1896631	0.9	0.54
TX01V5134RC-3	3948383	3296710	2100596	0.83	0.53
TX02A0252	2966744	2681395	1584633	0.9	0.53
TX03A0148	2802329	2318761	1472682	0.83	0.53
TX03A0563	574209	520187	338928	0.91	0.59
TX04A001246	3426856	2961825	1783574	0.86	0.52
TX04M410164	7466368	6737108	3994088	0.9	0.53
TX04M410211	2418142	2178740	1236880	0.9	0.51
TX04V075080	3043470	2727581	1634153	0.9	0.54
TX05A001188	1254773	1074930	418161	0.86	0.33
TX05A001822	1608082	1407524	510745	0.88	0.32
TX05V7259	1599538	1435099	522600	0.9	0.33
TX05V7269	1220685	1107364	367582	0.91	0.3
TX06A001132	1547870	1338864	475486	0.86	0.31
TX06A001263	1361940	1144503	405331	0.84	0.3
TX06A001281	1636428	1390733	514650	0.85	0.31
TX06A001386	1803104	1545513	555236	0.86	0.31
TX06V7266	1375961	1157767	428362	0.84	0.31
TX07A001279	1347941	1210910	438657	0.9	0.33
TX07A001318	1266220	1079398	400435	0.85	0.32
TX07A001420	1292623	1120591	407217	0.87	0.32
TX86A5606	1805474	1537743	981112	0.85	0.54
TX86A8072	2044729	1839213	1085129	0.9	0.53
TX96D1073	8190897	6986676	4271374	0.85	0.52
TX99A0153-1	3237534	2780402	1740914	0.86	0.54
TX99U8618	3521755	3173803	1956400	0.9	0.56
Vanguard	3256794	2752311	1749694	0.85	0.54
Venango	1463373	1284635	466032	0.88	0.32
Vista	2374761	2016391	1284757	0.85	0.54
Vona	3767930	3374484	2080497	0.9	0.55
W04-417	1960930	1655764	617608	0.84	0.31
Wahoo	1551415	1399040	805893	0.9	0.52
Warrior	2784299	2545777	1524095	0.91	0.55
WB411W	1620442	1366174	493880	0.84	0.3
Wendy	2583701	2313822	1389537	0.9	0.54
Wesley	2288039	1966918	1227835	0.86	0.54
Wichita	3370519	3037455	1724113	0.9	0.51
Windstar	2458243	2147873	1338657	0.87	0.54
Winoka	2324703	1982480	1221007	0.85	0.53
Winridge	3451859	2870115	1885488	0.83	0.55
Yellowstone	2642989	2150995	1374498	0.81	0.52
Yogo	2315471	2073005	1148902	0.9	0.5
Yuma	2628941	2280948	1300000	0.87	0.5
Yumar	2264164	1923403	1194945	0.85	0.53
Total	736847218	640582951	372351242	0.87	0.49
